# Supplementary material for: Performance of AnMBRs treating low strength wastewater with different carbon sources at decreasing HRTs and its linkage to Methanosaeta with high specific affinity
Source: Royal Society of Chemistry journal article supplement (doi:10.1039/d1ew00930c), 2022-01-01
Supplement: d1ew00930c1.pdf [file d1ew00930c1.pdf]

*Supplemental Materials*

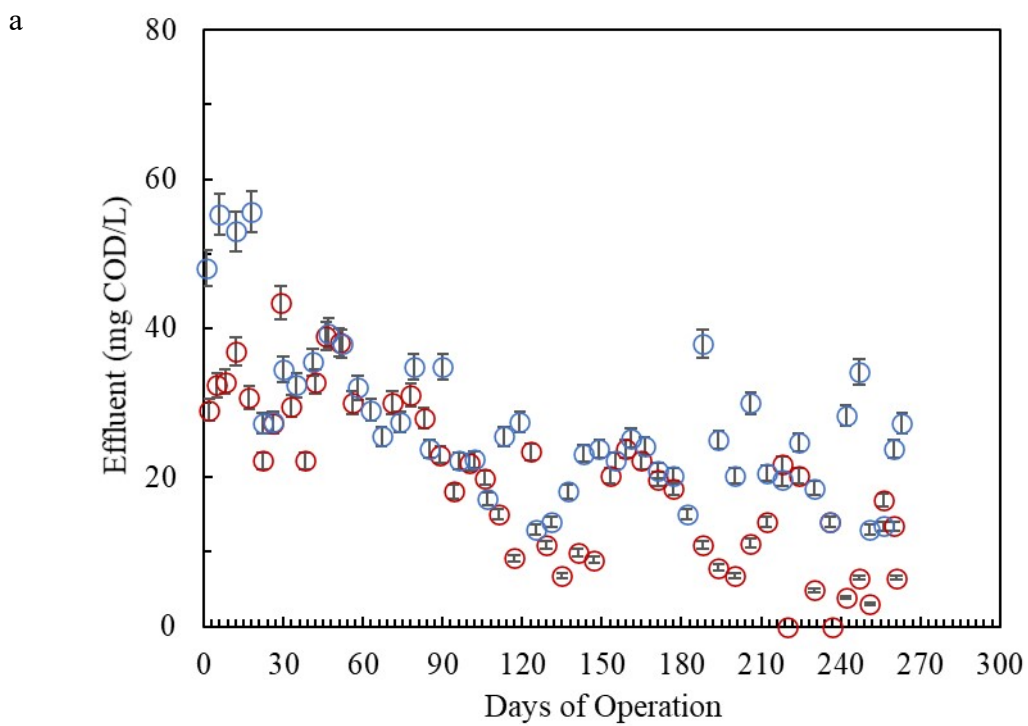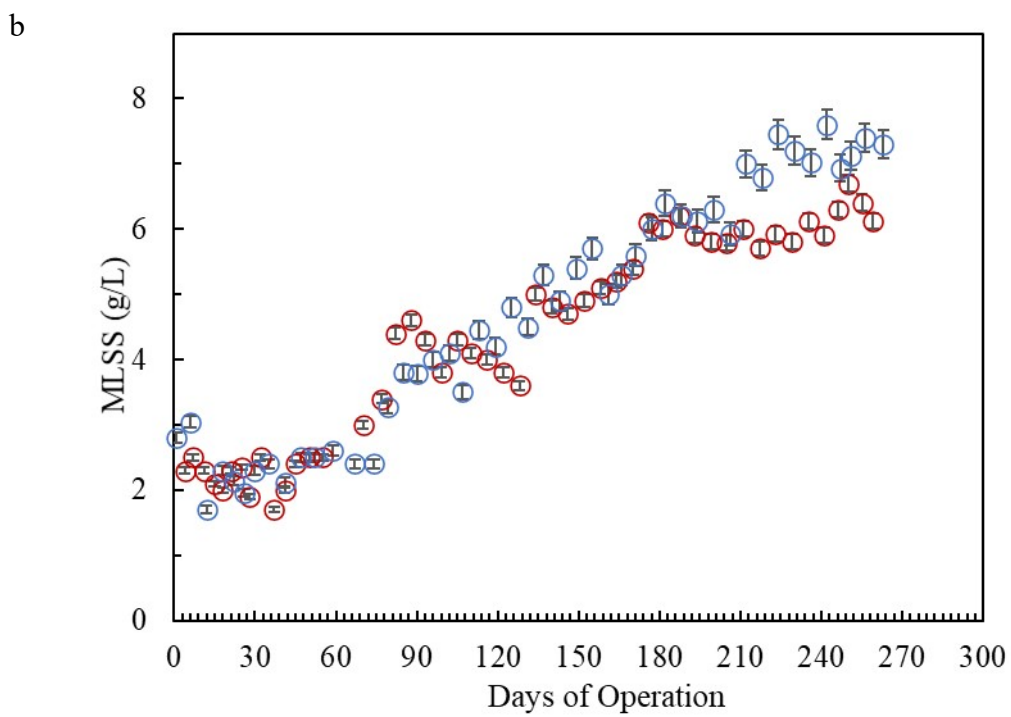

**Figure S1** Effluent COD (a) and MLSS (b) concentrations from the two AnMBRs (red circles for AnMBR-A; blue circles for AnMBR-G) at decreasing HRTs (24 h from day 1 to day 60, 12 h from day 61 to day 170, and 6 h from day 170 to day 270).

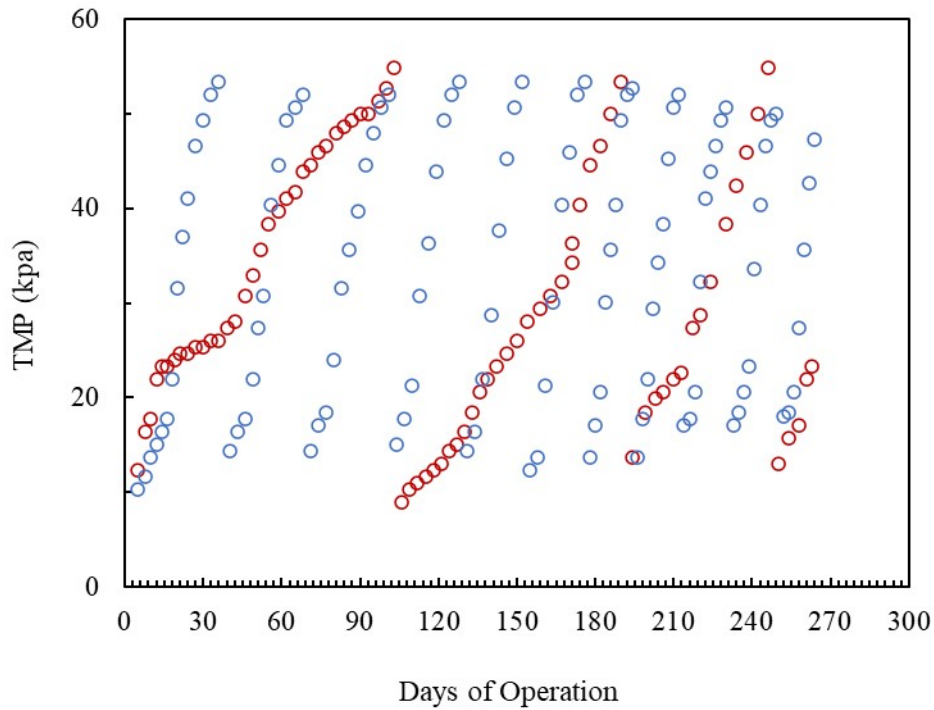

**Figure S2** Changes in TMP with time from the two AnMBRs (red circles for AnMBR-A; blue circles for AnMBR-G) over a period of approximately 270 days.

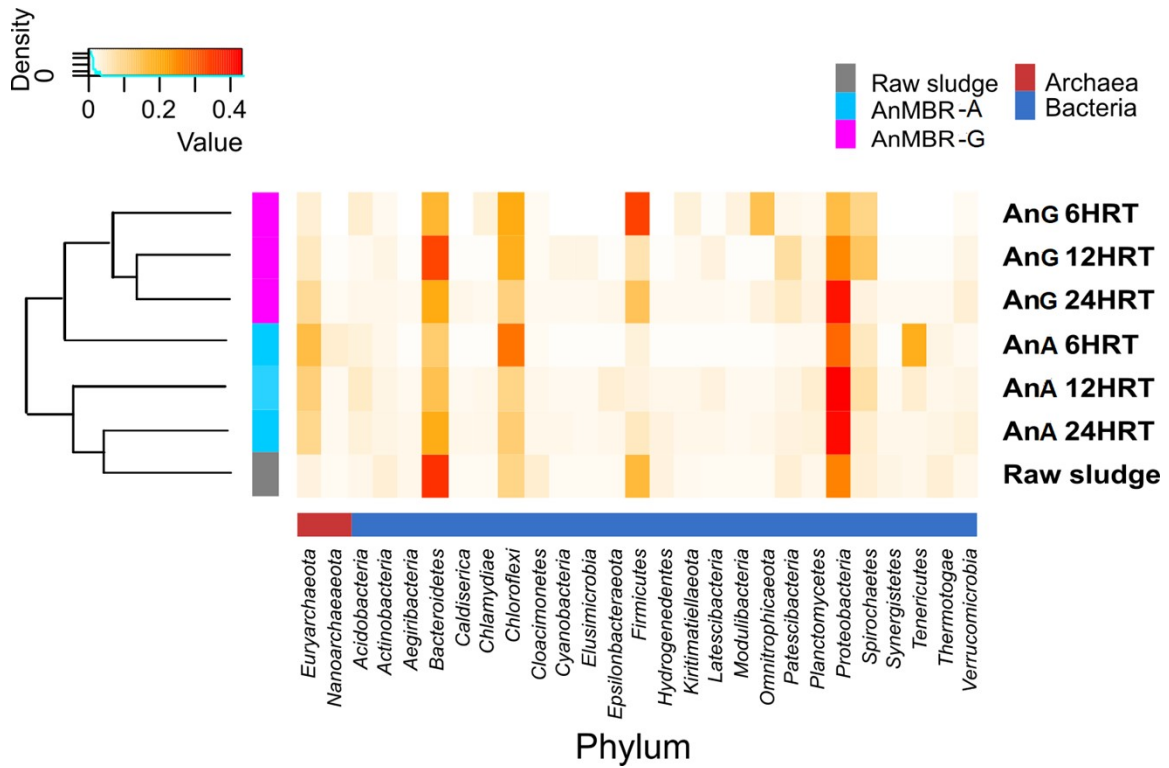

**Figure S3** Heatmap of the distribution of dominant phyla and Joining clustering by using Bray-Curtis similarity index of anaerobic sludge obtaining from the AnMBRs (AnA stands for AnMBR-A and AnG stands for AnMBR-G) at decreasing HRTs.

**Table S1** Operating conditions of AnMBR systems.

| Treatment     | AnMBR-A        |       |       | AnMBR-G |       |       |
|---------------|----------------|-------|-------|---------|-------|-------|
|               | Run 1          | Run 2 | Run 3 | Run 1   | Run 2 | Run 3 |
| Carbon Source | Sodium acetate |       |       | Glucose |       |       |
| HRT (h)       | 24             | 12    | 6     | 24      | 12    | 6     |
| SRT (d)       | 40             |       |       |         |       |       |

**Table S2** Significance tests of the structures of the whole communities between samples obtaining from the AnMBRs at decreasing HRTs (from 24, to 12, and to 6 h).

| Sludge samples | Raw sludge | 24 h       | 12 h       | 6 h        |
|----------------|------------|------------|------------|------------|
| AnMBR-A        | 24 h       | $p < 0.01$ |            | $p < 0.01$ |
|                | 12 h       | $p < 0.01$ | $p < 0.01$ | $p < 0.01$ |
|                | 6 h        | $p < 0.01$ | $p < 0.01$ | $p < 0.01$ |
| AnMBR-G        | 24 h       | $p < 0.01$ |            | $p < 0.01$ |
|                | 12 h       | $p < 0.01$ | $p < 0.01$ | $p < 0.05$ |
|                | 6 h        | $p < 0.01$ | $p < 0.01$ | $p < 0.05$ |

**Table S3** Significance tests of the structures of the whole communities between samples obtaining from each reactor in the middle and end of each operational stage.

| Treatment |        | AnMBR-A    |            |
|-----------|--------|------------|------------|
|           |        | Middle*    | End*       |
| 24 h      | Middle |            | $p > 0.05$ |
|           | End    | $p > 0.05$ |            |
| 12 h      | Middle |            | $p > 0.05$ |
|           | End    | $p > 0.05$ |            |
| 6 h       | Middle |            | $p > 0.05$ |
|           | End    | $p > 0.05$ |            |
|           |        | AnMBR-G    |            |
| 24 h      | Middle |            | $p > 0.05$ |
|           | End    | $p > 0.05$ |            |
| 12 h      | Middle |            | $p > 0.05$ |
|           | End    | $p > 0.05$ |            |
| 6 h       | Middle |            | $p > 0.05$ |
|           | End    | $p > 0.05$ |            |

Middle\*: Sludge obtaining in the middle of the run

End\*: Sludge obtaining at the end of the run

**Table S4** Conversion of the average copies/L to cells/L, cells/g, and percent of dominant species in anaerobic sludge obtained from AnMBRs at decreasing HRTs.

|                                   |                           | AnMBR-A      |                      |                      |                        | AnMBR-G      |                      |                      |                        |
|-----------------------------------|---------------------------|--------------|----------------------|----------------------|------------------------|--------------|----------------------|----------------------|------------------------|
|                                   |                           | copies/L     | cells/L <sub>a</sub> | cells/g <sup>b</sup> | % Biomass <sup>c</sup> | copies/L     | cells/L <sub>a</sub> | cells/g <sup>b</sup> | % Biomass <sup>c</sup> |
| Raw<br>sludge                     | Bacteria                  | 2.07E+1<br>1 | 5.19E+<br>10         | 3.99E+<br>10         | 78.52                  | 2.07E+1<br>1 | 5.19E+<br>10         | 3.99E+<br>10         | 78.52                  |
|                                   | Archaea                   | 2.33E+1<br>0 | 1.42E+<br>10         | 1.09E+<br>10         | 21.48                  | 2.33E+1<br>0 | 1.42E+<br>10         | 1.09E+<br>10         | 21.48                  |
|                                   | <i>Methanosaeta</i>       | 1.33E+1<br>0 | 8.85E+<br>09         | 6.81E+<br>09         | 13.39                  | 1.33E+1<br>0 | 8.85E+<br>09         | 6.81E+<br>09         | 13.39                  |
|                                   | <i>Methanosarcina</i>     | 6.78E+0<br>8 | 2.26E+<br>08         | 1.74E+<br>08         | 0.34                   | 6.78E+0<br>8 | 2.26E+<br>08         | 1.74E+<br>08         | 0.34                   |
|                                   | <i>Methanomicrobiales</i> | 4.90E+0<br>9 | 2.72E+<br>09         | 2.09E+<br>09         | 4.12                   | 4.90E+0<br>9 | 2.72E+<br>09         | 2.09E+<br>09         | 4.12                   |
|                                   | <i>Methanobacteriales</i> | 1.02E+0<br>8 | 4.61E+<br>07         | 3.55E+<br>07         | 0.07                   | 1.02E+0<br>8 | 4.61E+<br>07         | 3.55E+<br>07         | 0.07                   |
|                                   |                           |              | copies/L             | cells/L              | cells/g                | % Biomass    | copies/L             | cells/L              | cells/g                |
| Sludge<br>at<br>HRT<br>of 24<br>h | Bacteria                  | 2.46E+1<br>1 | 6.17E+<br>10         | 2.80E+<br>10         | 59.32                  | 3.61E+1<br>1 | 9.08E+<br>10         | 3.95E+<br>10         | 51.18                  |
|                                   | Archaea                   | 6.94E+1<br>0 | 4.23E+<br>10         | 1.92E+<br>10         | 40.68                  | 1.42E+1<br>1 | 8.66E+<br>10         | 3.76E+<br>10         | 48.82                  |
|                                   | <i>Methanosaeta</i>       | 5.78E+1<br>0 | 3.85E+<br>10         | 1.59E+<br>10         | 33.67                  | 4.40E+1<br>0 | 2.94E+<br>10         | 1.28E+<br>10         | 16.55                  |
|                                   | <i>Methanosarcina</i>     | 1.47E+0<br>9 | 4.88E+<br>08         | 2.22E+<br>08         | 0.47                   | 1.88E+0<br>9 | 6.27E+<br>08         | 2.72E+<br>08         | 0.35                   |
|                                   | <i>Methanomicrobiales</i> | 1.96E+1<br>0 | 1.09E+<br>10         | 4.51E+<br>09         | 9.54                   | 3.28E+1<br>0 | 1.82E+<br>10         | 7.92E+<br>09         | 10.28                  |
|                                   | <i>Methanobacteriales</i> | 6.83E+0<br>7 | 3.10E+<br>07         | 1.41E+<br>07         | 0.03                   | 2.49E+1<br>0 | 1.13E+<br>10         | 4.92E+<br>09         | 6.38                   |
|                                   |                           |              | copies/L             | cells/L              | cells/g                | % Biomass    | copies/L             | cells/L              | cells/g                |
| Sludge<br>at<br>HRT<br>of 12<br>h | Bacteria                  | 2.54E+1<br>1 | 6.39E+<br>10         | 1.49E+<br>10         | 40.51                  | 5.90E+1<br>1 | 1.48E+<br>11         | 3.37E+<br>10         | 78.67                  |
|                                   | Archaea                   | 1.54E+1<br>1 | 9.38E+<br>10         | 2.18E+<br>10         | 59.49                  | 6.60E+1<br>0 | 4.02E+<br>10         | 9.14E+<br>09         | 21.33                  |
|                                   | <i>Methanosaeta</i>       | 1.32E+1<br>1 | 8.82E+<br>10         | 2.05E+<br>10         | 55.59                  | 4.14E+1<br>0 | 2.76E+<br>10         | 6.27E+<br>09         | 14.63                  |
|                                   | <i>Methanosarcina</i>     | 6.74E+0<br>9 | 2.25E+<br>09         | 5.22E+<br>08         | 1.43                   | 3.17E+0<br>9 | 1.06E+<br>09         | 2.40E+<br>08         | 0.56                   |
|                                   | <i>Methanomicrobiales</i> | 5.65E+0<br>9 | 3.14E+<br>09         | 7.30E+<br>09         | 1.99                   | 1.05E+1<br>0 | 5.84E+<br>09         | 1.33E+<br>09         | 3.10                   |
|                                   | <i>Methanobacteriales</i> | 1.38E+0<br>8 | 6.27E+<br>07         | 1.46E+<br>07         | 0.04                   | 2.01E+1<br>0 | 9.15E+<br>09         | 2.08E+<br>09         | 4.85                   |
|                                   |                           |              | copies/L             | cells/L              | cells/g                | % Biomass    | copies/L             | cells/L              | cells/g                |
| Sludge<br>at<br>HRT<br>of 6<br>h  | Bacteria                  | 2.58E+1<br>1 | 6.48E+<br>10         | 1.62E+<br>10         | 37.57                  | 5.20E+1<br>0 | 1.31E+<br>10         | 1.00E+<br>10         | 82.81                  |
|                                   | Archaea                   | 1.77E+1      | 1.08E+               | 2.69E+               | 62.43                  | 4.45E+0      | 2.71E+               | 2.08E+               | 17.19                  |

|                      |         |        |        |       |         |        |        |       |
|----------------------|---------|--------|--------|-------|---------|--------|--------|-------|
|                      | 1       | 11     | 10     |       | 9       | 09     | 09     |       |
| <i>Methanosaeta</i>  | 1.58E+1 | 1.05E+ | 2.63E+ | 61.08 | 2.98E+0 | 1.99E+ | 1.53E+ |       |
|                      | 1       | 11     | 10     |       | 9       | 09     | 09     | 12.60 |
| <i>Methanosarcin</i> | 9.14E+0 | 3.05E+ | 7.62E+ | 1.77  | 1.17E+0 | 3.90E+ | 3.00E+ |       |
| <i>a</i>             | 9       | 09     | 08     |       | 8       | 07     | 07     | 0.25  |
| <i>Methanomicro</i>  | 2.55E+0 | 1.42E+ | 3.54E+ | 0.82  | 1.08E+0 | 6.00E+ | 4.62E+ |       |
| <i>biales</i>        | 9       | 09     | 08     |       | 9       | 08     | 08     | 3.81  |
| <i>Methanobacter</i> | 2.19E+0 | 9.95E+ | 2.49E+ | 0.06  | 1.75E+0 | 7.95E+ | 6.12E+ |       |
| <i>iales</i>         | 8       | 07     | 07     |       | 9       | 08     | 08     | 5.05  |

Values are averaged for samples.

<sup>a</sup> Cells/L = copies/L ÷ gene copy number/cell. (The average 16S rDNA copies per genome in bacteria, archaea, *Methanosaeta*, *Methanosarcina*, *Methanomicrobiales*, and *Methanobacteriales* was 3.98, 1.64, 1.5, 3, 1.8, and 2.2, repetitively, according to previous studies (Hou et al., 2020; Klappenbach et al., 2001))

<sup>b</sup> Cells/g = cells/L ÷ g/L (mean mixed liquor suspended solids (MLSS)).

<sup>c</sup> The total of Bacterial and Archaeal 16S rRNA gene provides normalization for comparison to the subpopulations and is set at 100%.



## References

Hou L, Griswold N, Hu Z, 2020. Impact of decreasing hydraulic retention times on the specific affinity of methanogens and their community structures in an anaerobic membrane bioreactor process treating low strength wastewater. *Sci. Total Environ.* 739, 140373.

<http://doi.org/https://doi.org/10.1016/j.scitotenv.2020.140373>

Klappenbach JA, Saxman PR, Cole JR, Schmidt TM, 2001. rrndb: the Ribosomal RNA Operon Copy Number Database. *Nucleic Acids Res.* 29, 181-184.

<http://doi.org/10.1093/nar/29.1.181>
